# Supplementary material for: The burden of drug resistance tuberculosis in Ghana; results of the First National Survey
Source: PubMed Central journal article supplement (PMC8191906; doi:10.1371/journal.pone.0252819), 2021-06-10
Supplement: pone.0252819.s001.pdf [file pone.0252819.s001.pdf]

S1 Table: A list of participating hospitals selected for the Ghana National Tuberculosis Control programme showing districts and regions

| <b>Diagnostic Centers</b>            | <b>Districts</b>       | <b>Regions</b> |
|--------------------------------------|------------------------|----------------|
| Effiduase Government Hospital        | Juaben                 | Ashanti        |
| Manhyia Government Hospital          | Kumasi metro           | Ashanti        |
| Komfo Anokye Teaching Hospital       | Kumasi metro           | Ashanti        |
| Bawjiase Health Centre               | Awutu Senya            | Central        |
| Worawora Government Hospital         | Biakoye                | Volta          |
| Hohoe Municipal Hospital             | Hohoe                  | Volta          |
| Battor Government Hospital           | North Tongu            | Volta          |
| Asamankese Government Hospital       | West Akim              | Eastern        |
| Nsawam Government Hospital           | Nsawam Adoagyri        | Eastern        |
| Tetteh Quarshie Memorial Hospital    | Akwapim North          | Eastern        |
| Holy Family Hospital                 | Kwahu West             | Eastern        |
| Regional Hospital (Eastern Region)   | New Juaben             | Eastern        |
| Kintampo Municipal Hospital          | Kintampo North         | Brong Ahafo    |
| Techiman Holy Family Hospital        | Techiman South         | Brong Ahafo    |
| Lawra District Hospital              | Lawra                  | Upper West     |
| Nalerigu District Hospital           | East Mamprusi          | Northern       |
| Salaga District Hospital             | East Gonja             | Northern       |
| Bongo District Hospital              | Bongo                  | Upper East     |
| Bawku Presbyterian Hospital          | Bawku Municipal        | Upper East     |
| St. Martins de Porres Hospital Eikwe | Ellembelle             | Western        |
| Wassa Akropong Government Hospital   | Wassa Amenfi East      | Western        |
| Tarkwa Government Hospital           | Tarkwa Municipal       | Western        |
| Tema General Hospital                | Tema Metropolitan      | Greater Accra  |
| Kaneshie Polyclinic                  | Accra Metro            | Greater Accra  |
| Madina Polyclinic, Kekele            | Ga East Municipal      | Greater Accra  |
| Achimota Government Hospital         | Accra Metro            | Greater Accra  |
| Tema Polyclinic                      | Tema Metropolitan      | Greater Accra  |
| Saltpond Municipal Hospital          | Mfantseman             | Central        |
| Abura Dunkwa Government Hospital     | Abura Asebu Kwamankese | Central        |
| Swredu Government Hospital           | Agona West             | Central        |
| Cape Coast Teaching Hospital         | Cape Coast             | Central        |
| Dunkwa on offin Government Hospital  | Upper Denkyira East    | Central        |
| Effia Nkwanta Regional Hospital      | Sekondi Takoradi       | Western        |
