# Supplementary material for: The burden of drug resistance tuberculosis in Ghana; results of the First National Survey
Source: PubMed Central journal article supplement (PMC8191906; doi:10.1371/journal.pone.0252819), 2021-06-10
Supplement: pone.0252819.s002.pdf [file pone.0252819.s002.pdf]

S2 Table: Demographic characteristics of patients enrolled in the National TB drug resistance survey in Ghana in 2017

| Characteristic                          |                             | Frequency (N = 927) | Percent |
|-----------------------------------------|-----------------------------|---------------------|---------|
|                                         |                             |                     |         |
| <b>Sex</b>                              | Male                        | 645                 | 69.6    |
|                                         | Female                      | 282                 | 30.4    |
| <b>Age</b>                              | 18-27                       | 154                 | 16.7    |
|                                         | 28-37                       | 216                 | 23.2    |
|                                         | 38-47                       | 245                 | 26.4    |
|                                         | 48-57                       | 142                 | 15.3    |
|                                         | >57                         | 170                 | 18.4    |
| <b>HIV result</b>                       | Positive                    | 77                  | 8.3     |
|                                         | Negative                    | 311                 | 33.5    |
|                                         | Unknown                     | 539                 | 58.2    |
| <b>Previous history of TB treatment</b> | Yes                         | 67                  | 7.2     |
|                                         | No                          | 860                 | 92.8    |
| <b>Outcome of previous treatment</b>    | Relapse                     | 45                  | 4.9     |
|                                         | Treatment after failure     | 7                   | 0.7     |
|                                         | Loss to follow-up           | 12                  | 1.3     |
|                                         | Not applicable              | 863                 | 93.1    |
| <b>Region of Hometown</b>               | Ashanti region              | 73                  | 7.9     |
|                                         | Greater Accra region        | 44                  | 4.8     |
|                                         | Central region              | 218                 | 23.5    |
|                                         | Western region              | 121                 | 13.1    |
|                                         | Eastern region              | 118                 | 12.7    |
|                                         | Volta region                | 136                 | 14.7    |
|                                         | Brong Ahafo region          | 33                  | 3.6     |
|                                         | Northern region             | 83                  | 8.9     |
|                                         | Upper East region           | 47                  | 5.1     |
|                                         | Upper West region           | 48                  | 5.2     |
|                                         | Other regions outside Ghana | 6                   | 0.6     |
| <b>Occupation</b>                       | Public servant              | 48                  | 5.2     |
|                                         | Trader                      | 169                 | 18.3    |
|                                         | Farmer                      | 240                 | 25.9    |
|                                         | Mining                      | 37                  | 4       |

|                                   |                                        |     |      |
|-----------------------------------|----------------------------------------|-----|------|
|                                   | Unemployed                             | 104 | 11.2 |
|                                   | Artisan                                | 164 | 17.7 |
|                                   | Student                                | 43  | 4.6  |
|                                   | Pensioner                              | 18  | 1.9  |
|                                   | Fisherman                              | 29  | 3.1  |
|                                   | Other                                  | 75  | 8.1  |
| <b>Highest level of education</b> | None                                   | 218 | 23.5 |
|                                   | Non formal                             | 22  | 2.4  |
|                                   | Primary                                | 145 | 15.6 |
|                                   | JHS/Middle School                      | 357 | 38.5 |
|                                   | SHS/Technical/Vocational               | 147 | 15.9 |
|                                   | Tertiary                               | 38  | 4.1  |
| <b>Religion</b>                   | Christian                              | 705 | 76.1 |
|                                   | Islam                                  | 114 | 12.3 |
|                                   | Traditional                            | 54  | 5.8  |
|                                   | None                                   | 51  | 5.5  |
|                                   | Other                                  | 3   | 0.3  |
| <b>Marital status</b>             | Single/ Never Married                  | 259 | 28   |
|                                   | Married                                | 412 | 44.5 |
|                                   | Separated                              | 42  | 4.5  |
|                                   | Divorced                               | 108 | 11.6 |
|                                   | Widow/widower                          | 80  | 8.6  |
|                                   | Co-habitation                          | 26  | 2.8  |
| <b>Type of housing</b>            | Separate house                         | 150 | 16.2 |
|                                   | Semi-detached house                    | 83  | 8.9  |
|                                   | Flat/apartment                         | 66  | 7.1  |
|                                   | Compound house                         | 559 | 60.3 |
|                                   | Huts/buildings, same compound          | 32  | 3.5  |
|                                   | Huts/buildings, separate compounds     | 11  | 1.2  |
|                                   | Improvised home (kiosk, container)     | 13  | 1.4  |
|                                   | Living quarter attached to office/shop | 3   | 0.3  |
|                                   | Uncompleted building                   | 6   | 0.7  |
|                                   | Other                                  | 4   | 0.4  |
| <b>Lives alone</b>                | Yes                                    | 174 | 18.8 |
|                                   | No                                     | 753 | 81.2 |
| <b>Prison History</b>             | Yes                                    | 94  | 10.1 |

|                                                  |                                |     |      |
|--------------------------------------------------|--------------------------------|-----|------|
|                                                  | No                             | 833 | 89.9 |
| <b>Family History of TB</b>                      | Yes                            | 131 | 14.1 |
|                                                  | No                             | 717 | 77.4 |
|                                                  | Don't know                     | 79  | 8.5  |
| <b>History of death of family member from TB</b> | Yes                            | 52  | 5.6  |
|                                                  | No                             | 780 | 84.1 |
|                                                  | Don't know                     | 95  | 10.3 |
| <b>Smoking Status</b>                            | Yes currently                  | 53  | 5.7  |
|                                                  | No, I've never smoked          | 630 | 68   |
|                                                  | No, but I used to smoke        | 230 | 24.8 |
|                                                  | No, but I live with a smoker   | 14  | 1.5  |
| <b>Alcohol Use</b>                               | Yes                            | 249 | 26.9 |
|                                                  | No, I've never taken alcohol   | 397 | 42.8 |
|                                                  | No, but I used to take alcohol | 281 | 30.3 |
