# Supplementary material for: The burden of drug resistance tuberculosis in Ghana; results of the First National Survey
Source: PubMed Central journal article supplement (PMC8191906; doi:10.1371/journal.pone.0252819), 2021-06-10
Supplement: pone.0252819.s003.pdf [file pone.0252819.s003.pdf]

**S1 File:**  
**TB Drug Resistance Survey in Ghana**

**SCREENING QUESTIONNAIRE**

**PLEASE WRITE IN CAPITAL LETTERS**  
**INTERVIEW INFORMATION**

**NB: Please all responses must be filled. Also please write "X" in all skipped responses.**

**A**

**A1. Patient ID:**

|  |  |  |  |  |  |  |  |
|--|--|--|--|--|--|--|--|
|  |  |  |  |  |  |  |  |
|--|--|--|--|--|--|--|--|

|                                    |                                                                                                                                        |
|------------------------------------|----------------------------------------------------------------------------------------------------------------------------------------|
| A2. DATE OF INTERVIEW (dd/mm/yyyy) |                                                                                                                                        |
| A3. INTERVIEWER'S NAME             |                                                                                                                                        |
| A4<br>RESULT CODES:                | <b>NB: Fill in reason when ans 2 – 5 is selected</b><br>1. Completed<br>2. Partly Completed<br>3. Postponed<br>4. Refused<br>5. Others |
| A5. Other (Specify)                |                                                                                                                                        |
| A6. Reason                         |                                                                                                                                        |

|                                                              |                                                             |                                                                                |
|--------------------------------------------------------------|-------------------------------------------------------------|--------------------------------------------------------------------------------|
| A7. Surname                                                  | A8. First Name                                              | Date of Birth<br><br>A9  __ __  DD<br>A10  __ __  MM<br>A11  __ __ __ __  YYYY |
| A12. Age in completed years                                  | A13. Close contact's Name                                   | A14. Close Contact's active Phone No                                           |
| A15. Participant's active Phone Number:                      | A16. House No                                               | A17. Town (Residence)                                                          |
| A18. District (Residence)                                    | A19. Region (Residence)                                     | A20. Traceable Address/or landmark                                             |
| A21. If already a registered TB patient, registration number | A22. If already a registered TB patient, treatment category | A23. If already a registered TB patient, last smear result                     |
|                                                              |                                                             |                                                                                |



|                                            |                                                                                                                                                      |                                                                               |  |
|--------------------------------------------|------------------------------------------------------------------------------------------------------------------------------------------------------|-------------------------------------------------------------------------------|--|
|                                            |                                                                                                                                                      | 3. More than 4 weeks                                                          |  |
| C7                                         | Do you currently have chest pain?<br><b>If No → C9</b>                                                                                               | 1. Yes<br>2. No                                                               |  |
| C8                                         | If Yes, for how long in weeks?                                                                                                                       | 1. Less than two weeks<br>2. 2 – 4 weeks<br>3. More than 4 weeks              |  |
| C9                                         | Have you experienced any unintentional or unexpected weight loss in the past month?<br><b>If No → C11</b>                                            | 1. Yes<br>2. No                                                               |  |
| C10                                        | If Yes, for how long in weeks?                                                                                                                       | 1. Less than two weeks<br>2. 2 – 4 weeks<br>3. More than 4 weeks              |  |
| C11                                        | Do you currently have Fever?<br><b>If No → C13</b>                                                                                                   | 1. Yes<br>2. No                                                               |  |
| C12                                        | If Yes, for how long in weeks?                                                                                                                       | 1. Less than two weeks<br>2. 2 – 4 weeks<br>3. More than 4 weeks              |  |
| C13                                        | Do you have night sweats?<br><b>If No → C15</b>                                                                                                      | 1. Yes<br>2. No                                                               |  |
| C14                                        | If Yes, for how long in weeks?                                                                                                                       | 1. Less than two weeks<br>2. 2 – 4 weeks<br>3. More than 4 weeks              |  |
| C15                                        | Did you have the same/similar symptoms prior to this episode of illness?                                                                             | 1. Yes<br>2. No                                                               |  |
| <b>D - TB status and treatment history</b> |                                                                                                                                                      |                                                                               |  |
| D1                                         | Have you had a sputum examination before?                                                                                                            | 1. Yes<br>2. No<br>3. Don't remember                                          |  |
| D2                                         | Have you ever been previously diagnosed with TB?<br>(Please go through available medical files and other documents) <b>If No/Don't remember → D4</b> | 1. Yes<br>2. No<br>3. Don't remember                                          |  |
| D3                                         | If Yes, how long ago have you been diagnosed as having TB?                                                                                           | 1. 1 - 6 months<br>2. 7 - 12 months<br>3. 1 - 3 years<br>4. More than 3 years |  |
| D4                                         | Have you ever taken anti-TB drugs for more than a month?<br><b>If No → D7</b>                                                                        | 1. Yes<br>2. No<br>3. Don't know                                              |  |
| D5                                         | How many episodes of treatment have you had?                                                                                                         | 1. Once<br>2. Twice<br>3. Other                                               |  |
| D6                                         | Other (Specify)                                                                                                                                      |                                                                               |  |
| D7                                         | Have you ever previously received injections for more than one month?                                                                                | 1. Yes<br>2. No<br>3. Don't Know                                              |  |

|                                                                                            |                                                                                                |                                                                                               |  |
|--------------------------------------------------------------------------------------------|------------------------------------------------------------------------------------------------|-----------------------------------------------------------------------------------------------|--|
| D8                                                                                         | Are you currently taking any anti-TB medication?<br><b>If No →D24</b>                          | 1. Yes<br>2. No<br>3. Don't know                                                              |  |
| D8a                                                                                        | If Yes, where did/do you get your medication from?                                             | 1. Hospital pharmacy<br>2. Community pharmacy<br>3. Licensed Chemical seller<br>4. Other      |  |
| D9                                                                                         | Other (specify)                                                                                |                                                                                               |  |
| D10                                                                                        | Has there been a day that you forgot to take your medication?<br><b>If No →D12</b>             | 1. Yes<br>2. No                                                                               |  |
| D11                                                                                        | If Yes, for approximately how long?                                                            | 1. One day<br>2. 2-3 days<br>3. More than a week<br>4. More than a month                      |  |
| D12                                                                                        | Have you ever run out of your medication?                                                      | 1. Yes<br>2. No                                                                               |  |
| D13                                                                                        | Do you sometimes take your medication late?                                                    | 1. Yes<br>2. No                                                                               |  |
| D14                                                                                        | Has there ever been a reason not to take your medication?<br><b>If No →D16</b>                 | 1. Yes<br>2. No                                                                               |  |
| D15                                                                                        | If Yes, what are some of the reasons?                                                          |                                                                                               |  |
| D16                                                                                        | Do you think that you have too many pills/tablets to take/swallow?                             | 1. Yes<br>2. No                                                                               |  |
| D17                                                                                        | About how many times in the past month have you missed a whole day of treatment?               | 1. Once<br>2. Twice<br>3. Thrice<br>4. More than three times<br>5. Never<br>6. Don't remember |  |
| D18                                                                                        | Is it easy to obtain your TB medications?<br><b>If No →D20</b>                                 | 1. Yes<br>2. No                                                                               |  |
| D19                                                                                        | If Yes, do/did you have problem in obtaining the anti-TB medicines?                            | 1. Yes<br>2. No                                                                               |  |
| <b>Please tell us some of the problems you face</b>                                        |                                                                                                |                                                                                               |  |
| D20                                                                                        | Money for transport                                                                            | 1. Yes<br>2. No                                                                               |  |
| D21                                                                                        | Money for drugs                                                                                | 1. Yes<br>2. No                                                                               |  |
| D22                                                                                        | Lack of TB medicine from stores                                                                | 1. Yes<br>2. No                                                                               |  |
| D23                                                                                        | Others                                                                                         |                                                                                               |  |
| D24                                                                                        | Do you take other medications for your TB treatment?<br><b>If No →E1</b><br><b>If Yes →D25</b> | 1. Yes<br>2. No                                                                               |  |
| <b>If Yes, what are your other sources of medication apart from hospital and pharmacy?</b> |                                                                                                |                                                                                               |  |

|                           |                                                                                  |                                                                                                                                                                                                                                                           |  |
|---------------------------|----------------------------------------------------------------------------------|-----------------------------------------------------------------------------------------------------------------------------------------------------------------------------------------------------------------------------------------------------------|--|
| D25                       | Herbal medicines                                                                 | 1. Yes<br>2. No                                                                                                                                                                                                                                           |  |
| D26                       | Chinese medicines                                                                | 1. Yes<br>2. No                                                                                                                                                                                                                                           |  |
| D27                       | Homeopathy                                                                       | 1. Yes<br>2. No                                                                                                                                                                                                                                           |  |
| D28                       | Acupuncture                                                                      | 1. Yes<br>2. No                                                                                                                                                                                                                                           |  |
| D29                       | Traditional medicines                                                            | 1. Yes<br>2. No                                                                                                                                                                                                                                           |  |
| D30                       | Prayer camp                                                                      | 1. Yes<br>2. No                                                                                                                                                                                                                                           |  |
| D31                       | Other (specify)                                                                  |                                                                                                                                                                                                                                                           |  |
| <b>E - Final decision</b> |                                                                                  |                                                                                                                                                                                                                                                           |  |
| E1                        | Has the patient been treated for more than one month<br><b>If No /Unknown→F1</b> | 1. Yes<br>2. No<br>3. Unknown                                                                                                                                                                                                                             |  |
| E2                        | If Yes, what was the outcome of the previous treatment?                          | 1. Cured/treatment completed<br>2. Failed new patient regimen of first-line drugs only<br>3. Failed re-treatment regimen of first-line drugs only<br>4. Failed regimen which included second-line drugs<br>5. Lost to follow-up<br>6. Other<br>7. Unknown |  |
| E3                        | Other (Specify)                                                                  |                                                                                                                                                                                                                                                           |  |
| <b>F - Demographics</b>   |                                                                                  |                                                                                                                                                                                                                                                           |  |
| F1                        | What is your highest level of education                                          | 1. None<br>2. Non formal<br>3. Primary<br>4. JHS/Middle School<br>5. SHS/Technical/Vocational<br>6. Tertiary                                                                                                                                              |  |
| F2                        | Religion                                                                         | 1. Christian<br>2. Islam<br>3. Traditional<br>4. None<br>5. Other                                                                                                                                                                                         |  |
| F3                        | Other (specify)                                                                  |                                                                                                                                                                                                                                                           |  |
| F4                        | Marital status                                                                   | 1. Single/ Never Married<br>2. Married<br>3. Separated<br>4. Divorced                                                                                                                                                                                     |  |

|                                             |                                                                                                                                              |                                                                                                                                                                                                                                                                                                               |  |
|---------------------------------------------|----------------------------------------------------------------------------------------------------------------------------------------------|---------------------------------------------------------------------------------------------------------------------------------------------------------------------------------------------------------------------------------------------------------------------------------------------------------------|--|
|                                             |                                                                                                                                              | 5. Widow/widower<br>6. Co-habitation                                                                                                                                                                                                                                                                          |  |
| F5                                          | Have you had an HIV test before?<br><b>If No →G1</b>                                                                                         | 1. Yes<br>2. No                                                                                                                                                                                                                                                                                               |  |
| F6                                          | What is your HIV status? (Please go through available documents and crosscheck)                                                              | 1. Positive<br>2. Negative<br>3. Indeterminate<br>4. Unknown                                                                                                                                                                                                                                                  |  |
| <b>G - Housing</b>                          |                                                                                                                                              |                                                                                                                                                                                                                                                                                                               |  |
| G1                                          | What type of housing do you live in?                                                                                                         | 1. Separate house<br>2. Semi-detached house<br>3. Flat/apartment<br>4. Compound house<br>5. Huts/buildings, same compound<br>6. Huts/buildings, separate compounds<br>7. Tents<br>8. Improvised home (kiosk, container)<br>9. Living quarter attached to office/shop<br>10. Uncompleted building<br>11. Other |  |
| G2                                          | Other (specify)                                                                                                                              |                                                                                                                                                                                                                                                                                                               |  |
| G3                                          | Do you live alone?<br><b>If Yes →G5</b>                                                                                                      | 1. Yes<br>2. No                                                                                                                                                                                                                                                                                               |  |
| G4                                          | If No, how many people do you share accommodation with?                                                                                      | 1. With one other person<br>2. 2 - 5 other persons<br>3. 6 - 10 other persons<br>4. More than 10 persons                                                                                                                                                                                                      |  |
| G5                                          | Have you ever been imprisoned?<br><b>If No →H1</b>                                                                                           | 1. Yes<br>2. No                                                                                                                                                                                                                                                                                               |  |
| G6                                          | If Yes, Have you been imprisoned in the last 5 years?                                                                                        | 1. Yes<br>2. No                                                                                                                                                                                                                                                                                               |  |
| <b>H - Family history with TB infection</b> |                                                                                                                                              |                                                                                                                                                                                                                                                                                                               |  |
| H1                                          | Has anyone in your immediate family (your parents, brothers, sisters, or children) ever been diagnosed with TB? <b>If No/ Don't know →H4</b> | 1. Yes<br>2. No<br>3. Don't know                                                                                                                                                                                                                                                                              |  |
| H2                                          | If Yes, which family member/s?                                                                                                               | 1. Father<br>2. Mother<br>3. Brother<br>4. Sister<br>5. Son<br>6. Daughter<br>7. Other                                                                                                                                                                                                                        |  |

|                                  |                                                                                                                                                     |                                                                                                                                                                                                                 |  |
|----------------------------------|-----------------------------------------------------------------------------------------------------------------------------------------------------|-----------------------------------------------------------------------------------------------------------------------------------------------------------------------------------------------------------------|--|
| H3                               | Other (specify)                                                                                                                                     |                                                                                                                                                                                                                 |  |
| H4                               | Has anyone in your immediate family (your parents, brothers, sisters, or children) been declared dead from TB disease? <b>If No/Don't know → I1</b> | <ol style="list-style-type: none"> <li>1. Yes</li> <li>2. No</li> <li>3. Don't know</li> </ol>                                                                                                                  |  |
| H5                               | If Yes, which family member/s?                                                                                                                      | <ol style="list-style-type: none"> <li>1. Father</li> <li>2. Mother</li> <li>3. Brother</li> <li>4. Sister</li> <li>5. Son</li> <li>6. Daughter</li> <li>7. Other</li> </ol>                                    |  |
| H6                               | Other (specify)                                                                                                                                     |                                                                                                                                                                                                                 |  |
| <b>I - Lifestyle</b>             |                                                                                                                                                     |                                                                                                                                                                                                                 |  |
| I1                               | Do you smoke?                                                                                                                                       | <ol style="list-style-type: none"> <li>1. Yes currently → I2 → I4</li> <li>2. No, I've never smoked → I5</li> <li>3. No, but I used to smoke → I3 → I5</li> <li>4. No, but I live with a smoker → I5</li> </ol> |  |
| I2                               | How long have/did you smoke(d)?                                                                                                                     | Year.....<br>Month.....<br>Weeks.....                                                                                                                                                                           |  |
| I3                               | How long has it been since you quit smoking?                                                                                                        | Year.....<br>Month.....<br>Weeks.....                                                                                                                                                                           |  |
| I4                               | If Yes, currently, how many sticks do you smoke a day?                                                                                              | -- /day                                                                                                                                                                                                         |  |
| I5                               | Do you take alcohol?<br><b>If I1 = No, I've never taken alcohol → J1</b>                                                                            | <ol style="list-style-type: none"> <li>1. Yes</li> <li>2. No, I've never taken alcohol</li> <li>3. No, but I used to take alcohol</li> </ol>                                                                    |  |
| I6                               | If Yes, or No, but I used to take alcohol, on average how often do/did you drink alcohol?                                                           | <ol style="list-style-type: none"> <li>1. At least once per day (one drink)</li> <li>2. At least once per week</li> <li>3. At least once per month</li> <li>4. At least once per year</li> </ol>                |  |
| <b>J - Comorbidity screening</b> |                                                                                                                                                     |                                                                                                                                                                                                                 |  |
|                                  | <b>Have you ever been diagnosed with any of the following conditions?</b>                                                                           |                                                                                                                                                                                                                 |  |
| J1                               | Hypertension                                                                                                                                        | <ol style="list-style-type: none"> <li>1. Yes</li> <li>2. No</li> </ol>                                                                                                                                         |  |
| J2                               | Diabetes                                                                                                                                            | <ol style="list-style-type: none"> <li>1. Yes</li> <li>2. No</li> </ol>                                                                                                                                         |  |
| J3                               | Asthma                                                                                                                                              | <ol style="list-style-type: none"> <li>1. Yes</li> <li>2. No</li> </ol>                                                                                                                                         |  |

|    |                                                                    |                                                                                                  |  |
|----|--------------------------------------------------------------------|--------------------------------------------------------------------------------------------------|--|
| J4 | Cancer                                                             | 1. Yes<br>2. No                                                                                  |  |
| J5 | Cancer (Specify)                                                   |                                                                                                  |  |
| J6 | When was the first time you were told that you had this condition? | 1. Less than one year<br>2. Between 1-3 years<br>3. 4-6 years<br>4. More than 6 years<br>5. None |  |

### K - FOR OFFICIAL USE ONLY

#### Medical records

|    |                                                                                                                                    |                                                          |  |
|----|------------------------------------------------------------------------------------------------------------------------------------|----------------------------------------------------------|--|
| K1 | After going through available medical documents, have you discovered that the patient has been registered for TB treatment before? | 1. Yes<br>2. No<br>3. Unknown<br>4. No available records |  |
|----|------------------------------------------------------------------------------------------------------------------------------------|----------------------------------------------------------|--|

**INTERVIEWER:** THANK THE RESPONDENT FOR COMPLETING THIS FIRST PART OF THE INTERVIEW.

**INTERVIEWER:** Check the records to confirm current status of patient.

|    |                                          |                                                                               |  |
|----|------------------------------------------|-------------------------------------------------------------------------------|--|
| K2 | New smear positive<br><b>If Yes → K5</b> | 1. Yes<br>2. No                                                               |  |
| K3 | Previously treated                       | 1. Relapse<br>2. Treatment after failure<br>3. Loss to follow-up<br>4. Others |  |
| K4 | Others (undocumented information)        |                                                                               |  |

#### Specimen taken:

|    |                           |                 |  |
|----|---------------------------|-----------------|--|
| K5 | Sputum for TB DR test     | 1. Yes<br>2. No |  |
| K6 | Blood for genetics test   | 1. Yes<br>2. No |  |
| K7 | Blood for immunology test | 1. Yes<br>2. No |  |

### L - INTERVIEWER'S REMARKS

|    |                                                                             |                                                                                                                                                      |  |
|----|-----------------------------------------------------------------------------|------------------------------------------------------------------------------------------------------------------------------------------------------|--|
| L1 | <b>Was anyone else present during the interview?</b>                        | 1. No one else was present<br>2. Respondent's doctor/nurse<br>3. Other clients/Patients<br>4. Respondent's relative<br>5. Other Health professionals |  |
| L2 | <b>In general, what was the respondent's attitude during the interview?</b> | 1. Friendly, interested<br>2. Was cooperative, but not particularly interested<br>3. Impatient, worried<br>4. Hostile                                |  |

|    |                                                     |                                                                                                                                         |  |
|----|-----------------------------------------------------|-----------------------------------------------------------------------------------------------------------------------------------------|--|
| L3 | <b>Did the respondent understand the questions?</b> | <ol style="list-style-type: none"><li>1. Understood well</li><li>2. Did not understand very well</li><li>3. Understood poorly</li></ol> |  |
|----|-----------------------------------------------------|-----------------------------------------------------------------------------------------------------------------------------------------|--|
